# Supplementary material
Source: bioRxiv or medRxiv preprint supplement (https://medrxiv.org/content/medrxiv/early/2022/09/04/2022.09.02.22279556/DC1/embed/media-1.pdf)
Supplement: Supplementary file [file media-1.pdf]

**Supplement Materials:**

**Title: A pattern shift in SARS-CoV-2 Omicron variant transmission after the city lockdown--  
observational study based upon daily reported addresses of infected cases**

**Supplement A: supplement figures**

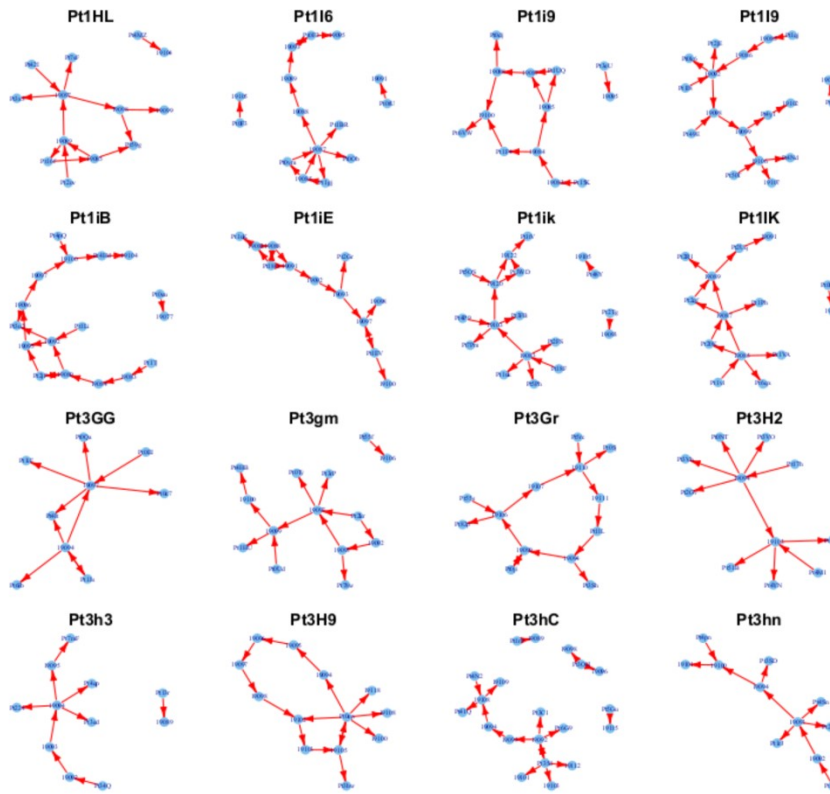

**Figure s01** The locations with 7 times as source of transmission (examples)

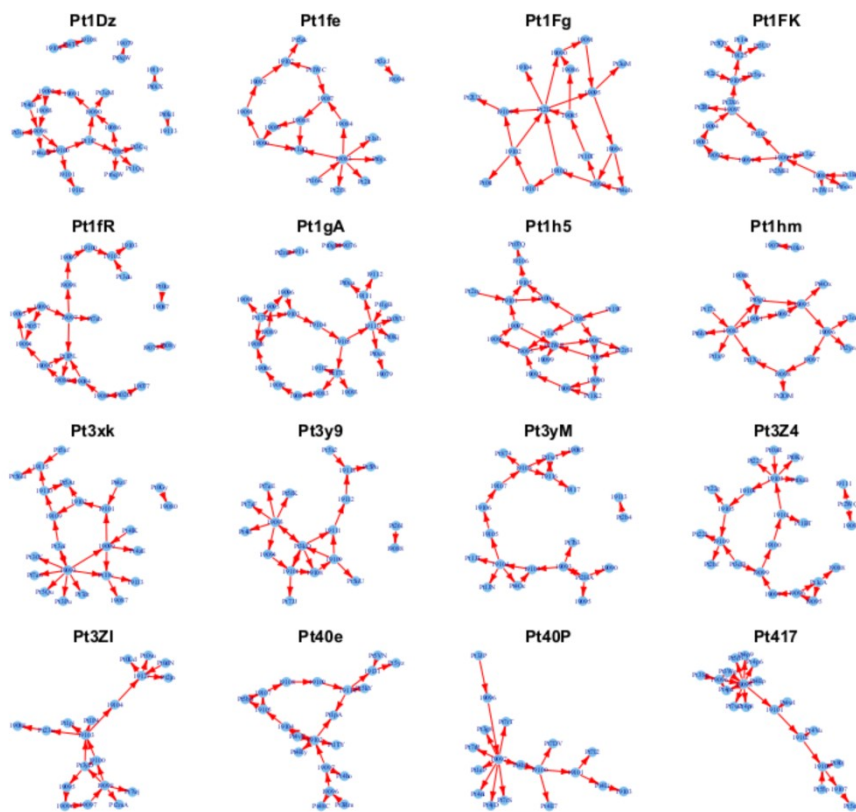

**Figure s02** The locations with 14 times as source of transmission (examples)

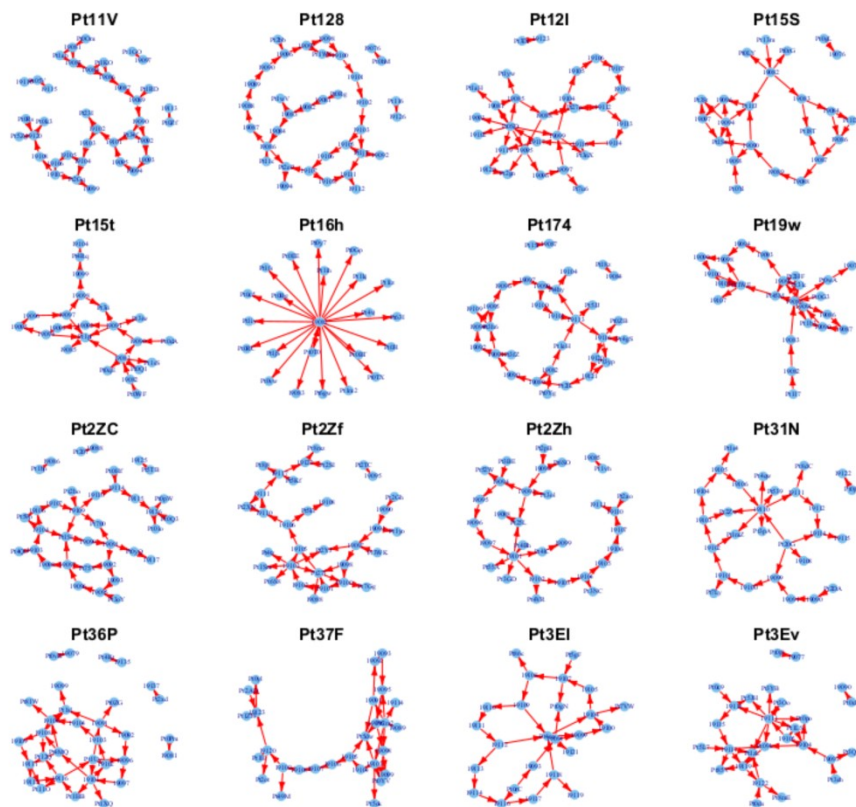

**Figure s03** The locations with 21 times as source of transmission (examples)

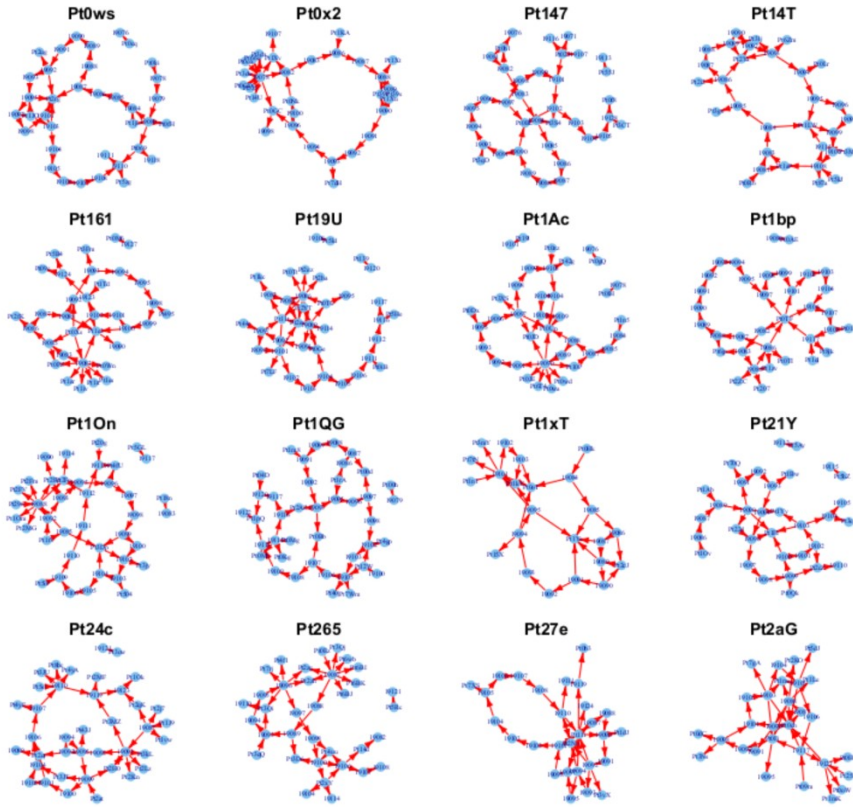

**Figure s04** The locations with 28 times as source of transmission (examples)

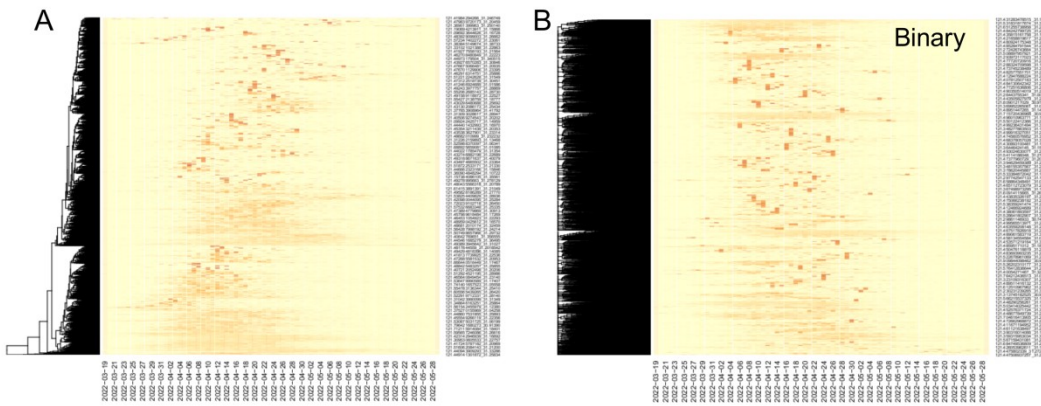

**Figure s05** The results of cluster of the repeatedly reported sample locations in chronologic sequence.

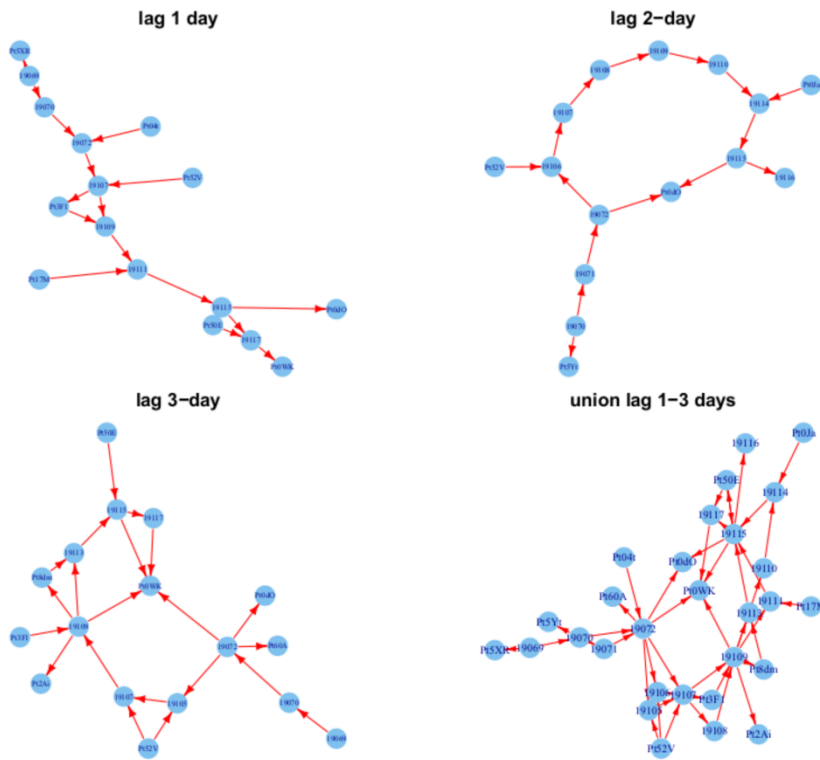

**Figure s06** Example of united point-wise transmission pattern of one to three days lag based upon nearest neighbour assumption

**Supplement B: Session information in R environment**

R version 4.0.1 (2020-06-06)

Platform: x86\_64-w64-mingw32/x64 (64-bit)

Running under: Windows 7 x64 (build 7601) Service Pack 1

attached base packages:

[1] stats graphics grDevices utils datasets methods base

other attached packages:

[1] broom\_0.7.9 rgdal\_1.5-31 plyr\_1.8.6 dplyr\_1.0.0  
 [5] zoo\_1.8-8 rgeos\_0.5-9 maps\_3.4.0 cluster\_2.1.0  
 [9] ggplot2\_3.3.2 igraph\_1.2.5 mapproj\_1.0-2 sp\_1.4-2  
 [13] spatstat\_2.3-4 spatstat.linnet\_2.3-2 spatstat.core\_2.4-2 rpart\_4.1-15  
 [17] nlme\_3.1-148 spatstat.random\_2.2-0 spatstat.geom\_2.4-0 spatstat.data\_2.2-0  
 [21] rgl\_0.108.3

loaded via a namespace (and not attached):

[1] tidyselect\_1.1.0 xfun\_0.30 purrr\_0.3.4 splines\_4.0.1  
 [5] lattice\_0.20-41 colorspace\_1.4-1 spatstat.utils\_2.3-0 vctrs\_0.3.1  
 [9] generics\_0.0.2 htmltools\_0.5.2 mgcv\_1.8-31 rlang\_0.4.12

|      |                 |                |                       |                   |
|------|-----------------|----------------|-----------------------|-------------------|
| [13] | pillar_1.4.4    | foreign_0.8-80 | glue_1.4.1            | withr_2.2.0       |
| [17] | lifecycle_0.2.0 | munsell_0.5.0  | gtable_0.3.0          | htmlwidgets_1.5.1 |
| [21] | knitr_1.39      | fastmap_1.1.0  | Rcpp_1.0.7            | tensor_1.5        |
| [25] | backports_1.1.7 | scales_1.1.1   | jsonlite_1.7.0        | abind_1.4-5       |
| [29] | deldir_1.0-6    | digest_0.6.25  | spatstat.sparse_2.1-1 | polyclip_1.10-0   |
| [33] | grid_4.0.1      | tools_4.0.1    | magrittr_1.5          | goftest_1.2-3     |
| [37] | tibble_3.0.1    | tidyr_1.1.0    | crayon_1.3.4          | pkgconfig_2.0.3   |
| [41] | ellipsis_0.3.1  | Matrix_1.2-18  | R6_2.4.1              | compiler_4.0.1    |

### Supplement C: Source code of user-defined function

#The following code to generate the point-based chronological graph by using library(igraph) and library(zoo);  
 #To generate the graph by user-defined rules to get the dataframe containing Point Name, Date, From and To as indicated in toy dateset(Figure 5A);

```

chronBpts<-function(dfnm, varnm, datev, ppt, lag=1, realR=TRUE, plt=TRUE, ...){
  vln<-length(varnm)
  if(vln==1){          #for only From or To separately
    subdf01<-subset(x=dfnm, dfnm[,varnm[1]] %in% ppt)          #From points available
    subdf01<-subdf01[!duplicated(subdf01),]                    #remove redundant records
    if (varnm=="From"){
      selfpi<-which(subdf01[, "From"]==subdf01[, "To"]) #date of self-propagation
      selfpdt<-as.integer(subdf01[selfpi, datev])+lag          #date propagation with lag
    }
    if (varnm=="To"){    #date of To plus lag
      subdf01[,datev]<-as.integer(subdf01[,datev])+lag
      selfpi<-which(subdf01[, "From"]==subdf01[, "To"]) #date of self-propagation
      selfpdt<-as.integer(subdf01[selfpi, datev])-lag          #date propagation with lag
    }
    ptsrc<-sort(as.integer(base::union(subdf01[,datev],selfpdt)))
    if (length(ptsrc)>1){
      ptsdt<-data.frame(zoo::rollapply(ptsrc, 2, function(x) {x}))
      names(ptsdtdt)<-c("From", "To")
    }
    else {
      ptsdt<-data.frame(From=ptsrc, To=ptsrc+lag)
    }
  }
}

```

```

ptsdt<-ptsdt[ptsdt$From!=ptsdt$To,]          #remove self connection
  grdfd<-data.frame(From=subdf01[, "From"], To=subdf01[, "To"])          #same dim grdfd and
subdf01
grdfd$From[which(grdfd$From==ppt)]<-subdf01[which(grdfd$From==ppt),datev] #replace ppt with date

  if (varnm=="To"){
    grdfd$To[which(grdfd$To==ppt)]<-subdf01[which(grdfd$To==ppt),datev] #replace ppt with date
  }
for (ti in 1:dim(grdfd)[1]){          #replace the To ppt with next date self-propagation
  if (grdfd$To[ti]==ppt){
    grdfd$To[ti]<-ptsrc[match(grdfd$From[ti], ptsrc)+1]          #the next in date sequence
  }
}
ptsdf<-rbind(ptsdt, grdfd)
ptsdf<-ptsdf[ptsdf$From!=ptsdf$To,]          #redundant day-to-day transmission
  ptsdf<-ptsdf[!duplicated(ptsdf),]
ptsdf<-ptsdf[order(ptsdf$From),]
}

if (vln>1){          #for both From and To combined
  if (!all(varnm==c("From", "To"))) stop("To provide From, To!")
  subdf01<-subset(x=dfnm, dfnm[,varnm[1]] %in% ppt)          #From points available
subdf01<-subdf01[!duplicated(subdf01),]          #remove redundant records
  subdf02<-subset(x=dfnm, dfnm[,varnm[2]] %in% ppt)          #To points available
  subdf02<-subdf02[!duplicated(subdf02),]          #remove redundant records
subdf02[, datev]<-subdf02[, datev]+lag          #To subset date plus lag
  selfpi<-which(subdf01[, "From"]==subdf01[, "To"])          #date of self-propagation
  selfpdt<-as.integer(subdf01[selfpi,datev])+lag          #date propagation with lag
  ptsrc1<-sort(as.integer(base::union(subdf01[,datev], selfpdt)))          #From
  ptsrc2<-sort(as.integer(base::union(subdf02[,datev], selfpdt)))          #To
  ptsrc12<-sort(base::union(ptsrc1, ptsrc2))
  if (length(ptsrc1)>1 | length(ptsrc2)>1){
    ptsdt1<-data.frame(zoo::rollapply(ptsrc1, 2, function(x) {x}))          #From To dates
    ptsdt12<-data.frame(zoo::rollapply(ptsrc12, 2, function(x) {x}))          #From To dates
    names(ptsdt1)<-c("From", "To")          #From
    names(ptsdt12)<-c("From", "To")          #From
  }
}

```

```

    }
else {
  ptsdt1<-data.frame(From=ptsrc1, To=ptsrc1+lag)
  ptsdt12<-data.frame(From=ptsrc12, To=ptsrc12+lag)
  }
ptsdt1<-ptsdt1[ptsdt1$From!=ptsdt1$To,]          #remove From self connection
ptsdt1<-ptsdt1[!duplicated(ptsdt1),]
ptsdt12<-ptsdt12[ptsdt12$From!=ptsdt12$To,]     #remove From self connection
ptsdt12<-ptsdt12[!duplicated(ptsdt12),]

  grfdf1<-data.frame(From=subdf01[, "From"], To=subdf01[, "To"])    #same dim grfdf and
subdf01
  grfdf1$From[which(grfdf1$From==ppt)]<-subdf01[which(grfdf1$From==ppt),datev]    #replace From
ppt with date
  grfdf2<-data.frame(From=subdf02[, "From"], To=subdf02[, "To"])    #same dim grfdf and
subdf02
  grfdf2$To[which(grfdf2$To==ppt)]<-subdf02[which(grfdf2$To==ppt),datev]    #replace To
ppt with date
  print("Combined From and To subsets!"); print(rbind(grfdf1, grfdf2))

  for (ti in 1:dim(grfdf1)[1]){    #replace the To ppt with next date self-propagation
if (grfdf1$From[ti]==ppt){
  grfdf1$From[ti]<-ptsrc1[match(as.integer(grfdf1$To[ti]), ptsrc1)]    #the next in date
sequence
  }
  }

  for (ti in 1:dim(grfdf2)[1]){    #replace the To ppt with next date self-propagation
if (grfdf2$To[ti]==ppt){
  grfdf2$To[ti]<-ptsrc2[match(as.integer(grfdf2$From[ti]), ptsrc2)+1]    #the next in
date sequence
  }
  }
  if (realR) {    #use only the date of From
ptsdf<-rbind(ptsdt1, grfdf1, grfdf2)    #reference dates two dfs
  }

```

```

else {
  ptsdf<-rbind(ptsdt12, grdfd1, grdfd2) #two dates two dfs
  }
ptsdf$From[which(ptsdf$From==ppt)]<-ptsdf$To[which(ptsdf$From==ppt)]
ptsdf$To[which(ptsdf$To==ppt)]<-ptsdf$From[which(ptsdf$To==ppt)]
ptsdf<-ptsdf[ptsdf$From!=ptsdf$To,] #redundant day-to-day transmission
ptsdf<-ptsdf[!duplicated(ptsdf),]#unique data allow From equal to To means within lag repeat
ptsdf<-ptsdf[order(ptsdf$From),] #by order of From
}

#prepare to plot or not
if (plt) {
  grfpt<-igraph::graph_from_data_frame(ptsdf) #to generate DAG
  plot(grfpt, ...)
  return(grfpt) #plot return graph
}
else {
  return(ptsdf) #not plot return df
}
}
#end

```

### #Example

```

#for data from those in toy dataset dfName (name of dataframe);
#alternatively, varnm can be "From" or "To" or both(as in follows);
#data value, "Date1" the date of From;
#point name in ppt="Pt001";
#time lag in lag=1 or other integer;
chronBPts(dfnm=dfName, varnm=c("From","To"), datev="Date1", ppt="Pt001", lag=1)

```
